# Supplementary material for: A Comparative Study of Nafion 212 and Sulfonated Poly(Ether Ether Ketone) Membranes with Different Degrees of Sulfonation on the Performance of Iron-Chromium Redox Flow Battery
Source: MDPI journal article supplement (doi:10.3390/membranes13100820), 2023-09-30
Supplement: s1 [file s1]

## Article

# A comparative study of Nafion 212 and sulfonated poly(ether ether ketone) membranes with different degrees of sulfonation on the performance of iron-chromium redox flow battery

Enrui Bai<sup>1</sup>, Haotian Zhu<sup>1,2</sup>, Chuanyu Sun<sup>3</sup>, Guanchen Liu<sup>4</sup>, Xiaoyin Xie<sup>2,\*</sup>, Chongyang Xu<sup>1,\*</sup>, Sheng Wu<sup>1,\*</sup>

<sup>1</sup> Yantai Research Institute, Harbin Engineering University, Yantai Shandong 264003, China; S321517001@163.com(E.B.); zht18732497702@163.com(H.Z.)

<sup>2</sup> School of Chemistry and Chemical Technology, Hubei Polytechnic University, Huangshi 435003, China;

<sup>3</sup> School of Electrical Engineering and Automation, Harbin Institute of Technology, Harbin 150001, China; chuanyu.sun@hit.edu.cn

<sup>4</sup> Hubei Xinye Energy-storage Co.,Ltd., Huangshi 435100, China; liuguanchen1123@163.com

\* Correspondence: xyxie@hbpu.edu.cn(X.X.); xcy110@126.com(C.X.); wusheng@hrbeu.edu.cn(S.W.); Tel.: +86-15549716559(X.X.)

## This word includes:

Figure S1, Figure S2 and Figure S3

**Citation:** Bai, E.; Zhu, H.; Sun, C.; Liu, G.; Xie, X.; Xu, C.; Wu, S. A comparative study of Nafion 212 and sulfonated poly(ether ether ketone) membranes with different degrees of sulfonation on the performance of iron-chromium redox flow battery.

*Membranes* **2023**, *13*, 820. <https://doi.org/10.3390/membranes13100820>

Academic Editor: Vladislav A. Sadykov

Received: 30 August 2023

Revised: 24 September 2023

Accepted: 28 September 2023

Published: 30 September 2023

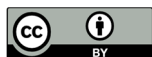

**Copyright:** © 2023 by the authors. Licensee MDPI, Basel, Switzerland. This article is an open access article distributed under the terms and conditions of the Creative Commons Attribution (CC BY) license (<https://creativecommons.org/licenses/by/4.0/>).

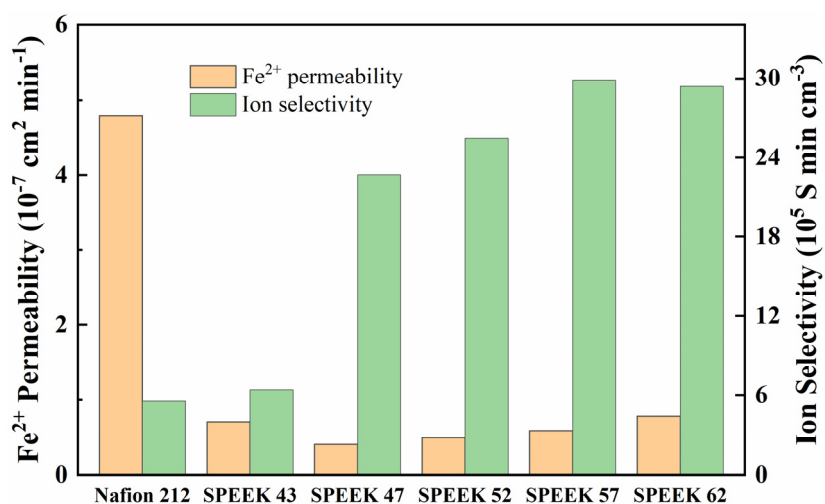

Figure S1. Fe<sup>2+</sup> permeability and ion selectivity.

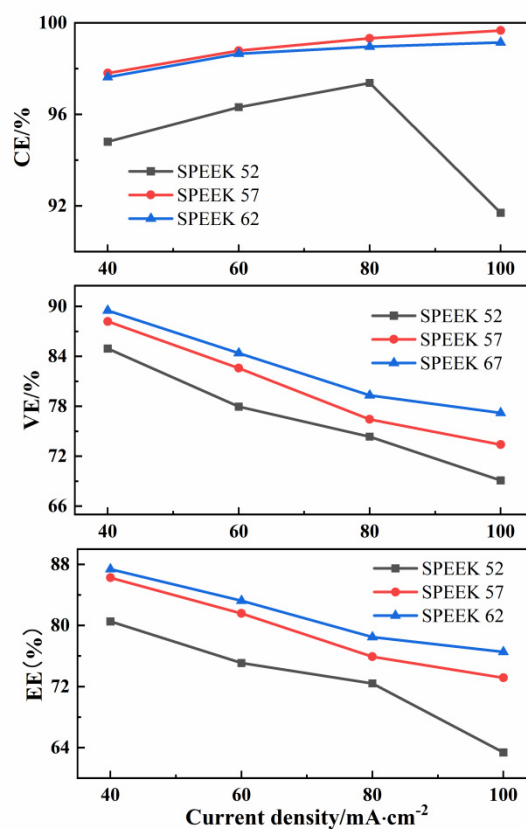

Figure S2. The performance of ICRFB single-cell with SPEEK 52, SPEEK 57 and SPEEK 62 membranes under different current densities.

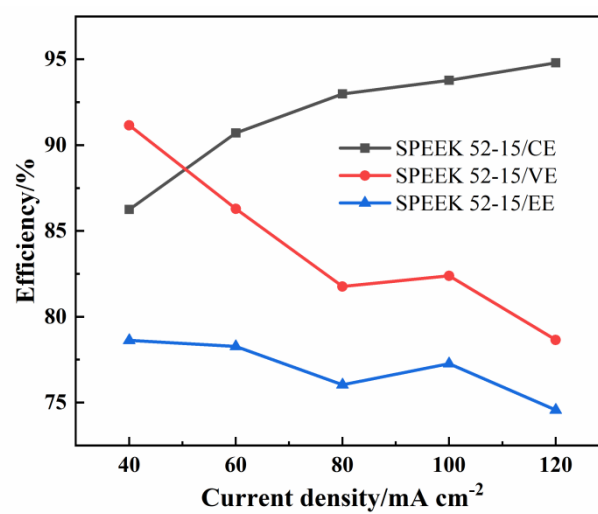

**Figure S3.** The performance of ICRFB single-cell with SPEEK 52-15 under different current densities.
